# Supplementary material for: Alpha-1,4-transglycosylation Activity of GH57 Glycogen Branching Enzymes Is Higher in the Absence of a Flexible Loop with a Conserved Tyrosine Residue
Source: MDPI journal article supplement (doi:10.3390/polym15132777), 2023-06-22
Supplement: s1 [file s1]

## Supplementary data

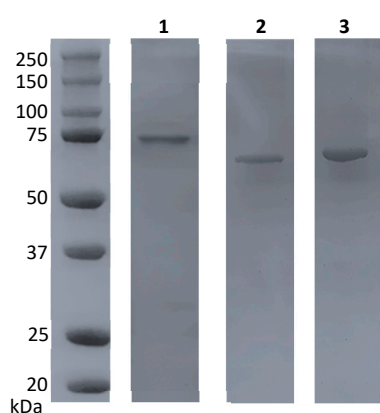

**Figure S1.** SDS-PAGE gel of purified TkGBE57 (*Thermococcus kodakarensis*; 79 kDa, lane 1), MsGBE57 (*Meiothermus sp.*, 56 kDa, lane 2) and TmGBE57 (*Thermotoga maritima*; 63 kDa, lane 3). Protein amount on gel is 1.25 µg.

**Table S1.** Activity of TmGBE57 (*Thermotoga maritima*), TkGBE57 (*Thermococcus kodakarensis*), MsGBE57 (*Meiothermus sp.*) & EcGBE13 (*Escherichia coli*) on amylose and a linear maltodextrin (MD18), analyzed with two different methods (iodine assay and reducing end assay).

| Method    |         | A                        | B                                               |                                            |             | C                                               |                                            |             |
|-----------|---------|--------------------------|-------------------------------------------------|--------------------------------------------|-------------|-------------------------------------------------|--------------------------------------------|-------------|
| Substrate |         | Iodine assay             | Reducing end assay                              |                                            |             | Reducing end assay                              |                                            |             |
|           |         | Amylose                  | Amylose                                         |                                            |             | MD18                                            |                                            |             |
|           |         | Total activity [mU/mg E] | Non-branching activity [mU <sup>NB</sup> /mg E] | Branching activity [mU <sup>B</sup> /mg E] | Ratio B:NB* | Non-branching activity [mU <sup>NB</sup> /mg E] | Branching activity [mU <sup>B</sup> /mg E] | Ratio B:NB* |
| Enzyme    | TmGBE57 | 84.3 ± 1.0 <sup>#</sup>  | 2.0 ± 0.2                                       | 3.1 ± 0.3                                  | 1.5 ± 0.0   | 4.4 ± 1.0                                       | 5.0 ± 0.6                                  | 1.2 ± 0.2   |
|           | TkGBE57 | 440.7 ± 30.3             | 11.0 ± 0.5                                      | 44.9 ± 5.7                                 | 4.0 ± 0.3   | 13.0 ± 5.6                                      | 92.4 ± 9.5                                 | 8.1 ± 2.3   |
|           | MsGBE57 | 20.0 ± 0.7               | 1.0 ± 0.1                                       | 1.9 ± 0.2                                  | 2.0 ± 0.3   | 5.2 ± 0.3                                       | 5.6 ± 0.2                                  | 1.1 ± 0.0   |
|           | EcGBE13 | 100.5 ± 11.2             | 13.4 ± 8.6                                      | 133.1 ± 27.5                               | 14.6 ± 7.3  | 120.1 ± 0.9                                     | 286.9 ± 42.5                               | 2.4 ± 0.3   |

<sup>#</sup> average of three independent measurements with standard deviation

\*ratio branching activity to non-branching activity

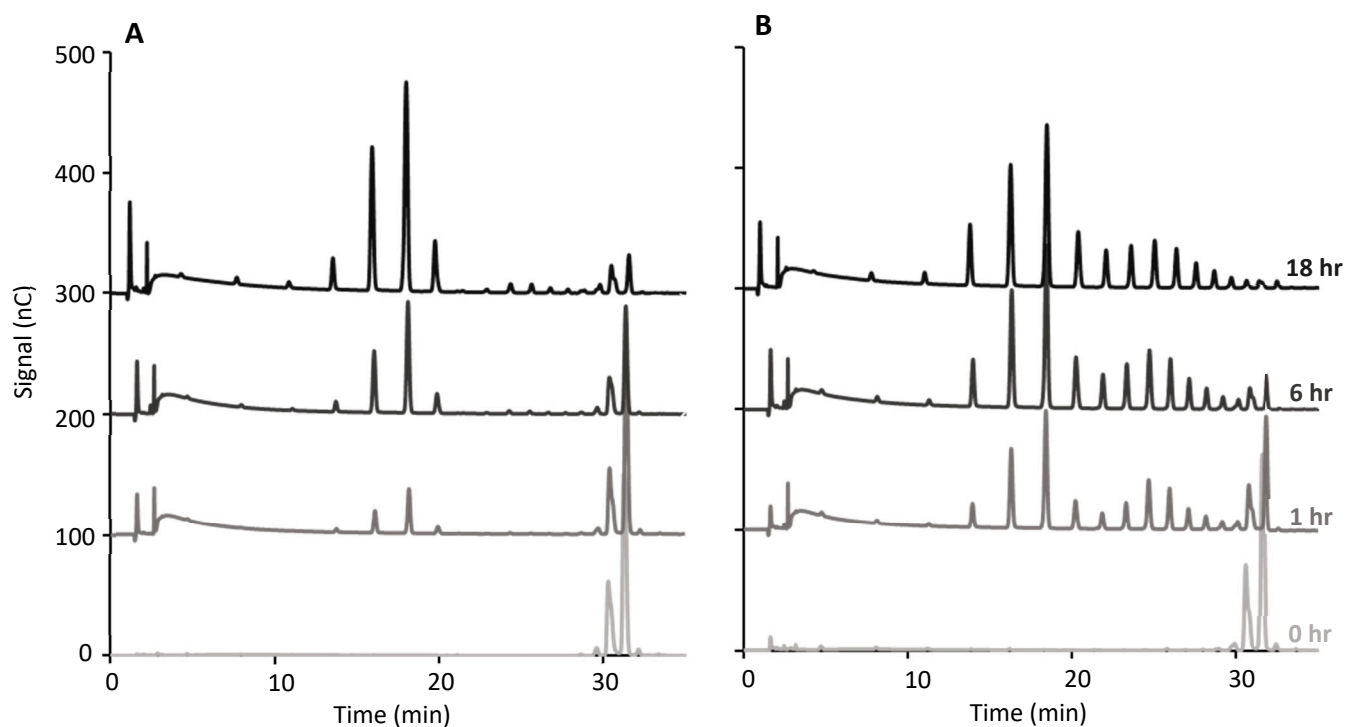

**Figure S2.** Chain length distribution of MD18 modified with TkGBE57 (*Thermococcus kodakarensis*;  $1\text{U}^{\text{B}}/\text{g S}$ ) over time before [A] and after [B] debranching compared to the untreated substrate.

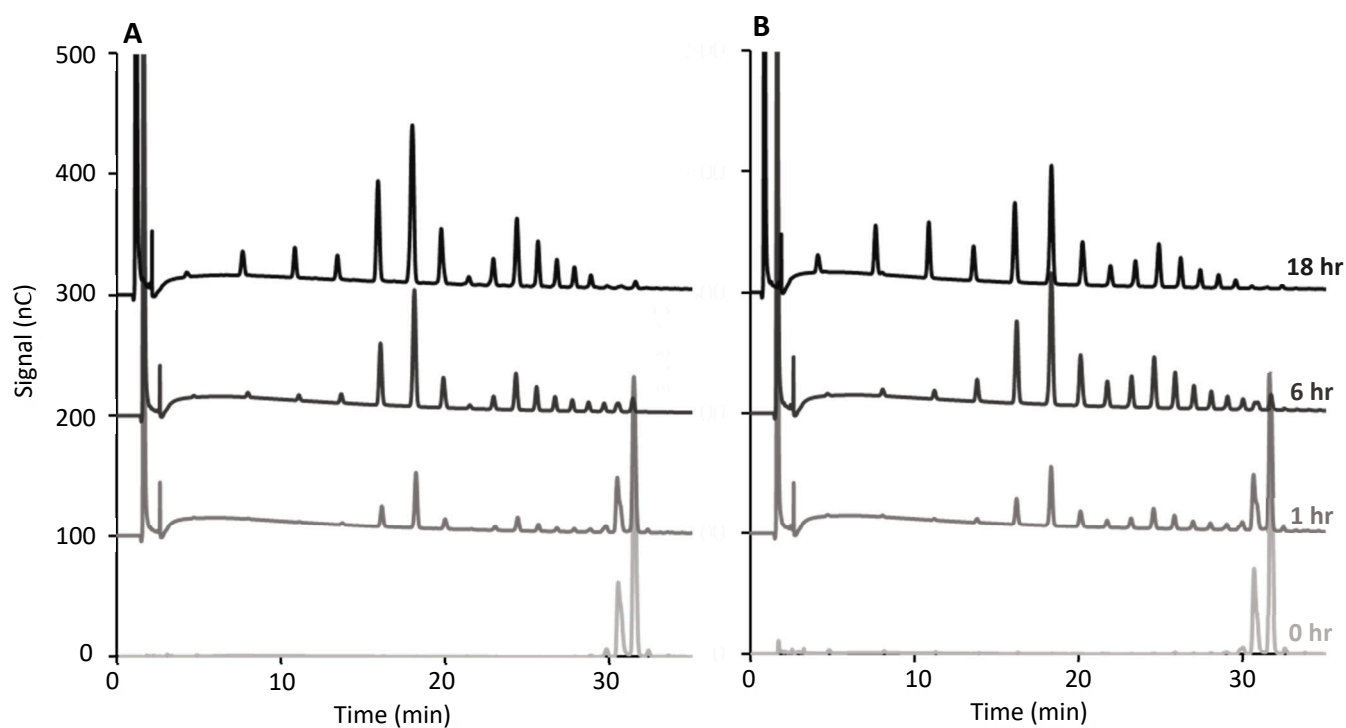

**Figure S3.** Chain length distribution of MD18 modified with TmGBE57 (*Thermotoga maritima*;  $1\text{U}^{\text{B}}/\text{g S}$ ) over time before [A] and after [B] debranching compared to the untreated substrate.

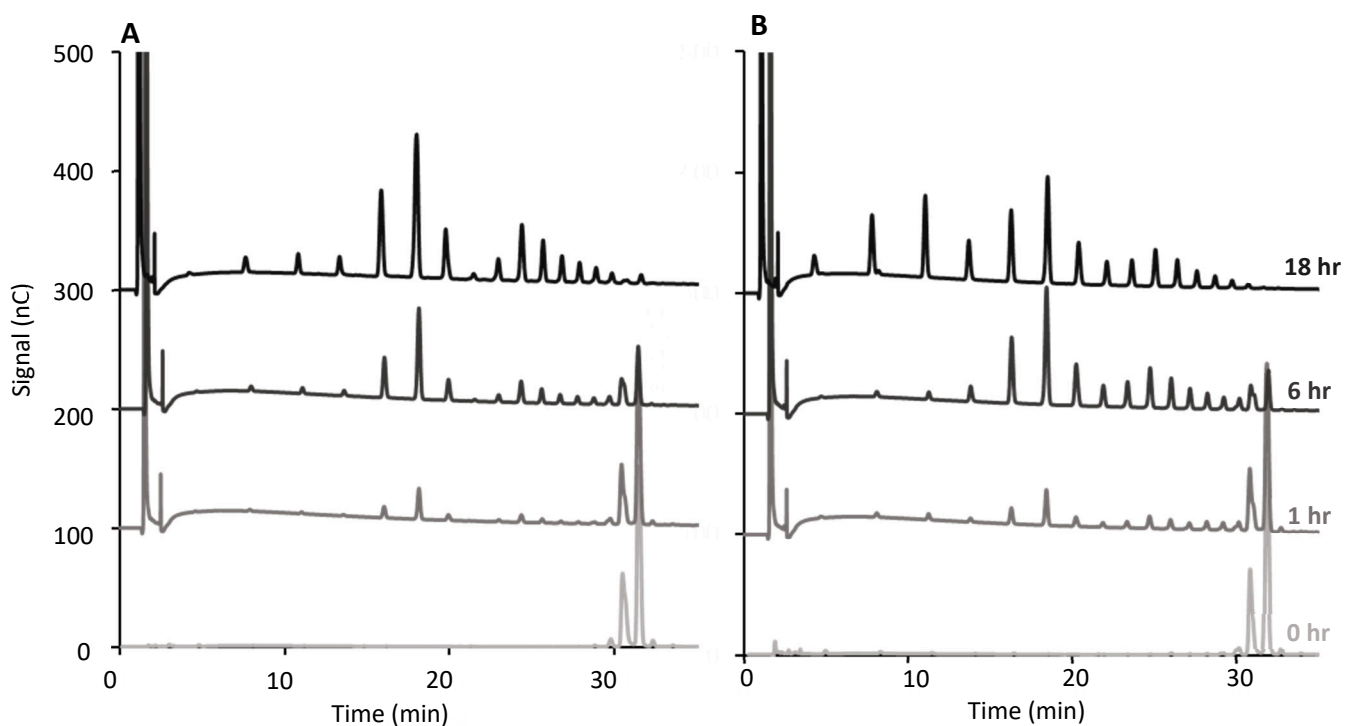

**Figure S4.** Chain length distribution of MD18 modified with MsGBE57 (*Meiothermus sp.*; 1U<sup>B</sup>/g S) over time before [A] and after [B] debranching compared to the untreated substrate.
